# Supplementary material for: Organic Carbon Characteristics in Ice-rich Permafrost in Alas and Yedoma Deposits, Central Yakutia, Siberia
Source: Copernicus journal article supplement (doi:10.5194/bg-2019-470), 2020-01-03
Supplement: Supplementary file [file bg-2019-470-AC2-supplement.pdf]

*Supplement of*

## **Organic Carbon Characteristics in Ice-rich Permafrost in Alas and Yedoma Deposits, Central Yakutia, Siberia**

Torben Windirsch<sup>1,2</sup>, Guido Grosse<sup>1,2</sup>, Mathias Ulrich<sup>3</sup>, Lutz Schirrmeister<sup>1</sup>, Alexander N. Fedorov<sup>4,5</sup>, Pavel Ya. Konstantinov<sup>4</sup>, Matthias Fuchs<sup>1</sup>, Loeka L. Jongejans<sup>1,2</sup>, Juliane Wolter<sup>1</sup>, Thomas Opel<sup>1</sup>, and Jens Strauss<sup>1</sup>

<sup>1</sup>Alfred Wegener Institute Helmholtz Centre for Polar and Marine Research, Telegrafenberg A45, 14473 Potsdam, Germany

<sup>2</sup>University of Potsdam, Institute of Geosciences, Karl-Liebknecht-Straße 24-25, 14476 Potsdam, Germany

<sup>3</sup>Leipzig University, Institute for Geography, Johannisallee 19a, 04103 Leipzig, Germany

<sup>4</sup>Melnikov Permafrost Institute, SB RAS, 36 Merzlotnaya str., Yakutsk, Republic of Sakha, Russia, 677010

<sup>5</sup>BEST International Centre, North-Eastern Federal University, 58 Belinsky str., Yakutsk, Republic of Sakha, Russia, 677027

*Correspondence to:* Torben Windirsch (torben.windirsch@awi.de)

- Figure S1 – Digital mapping of the Yukechi Alas landscape
- Figure S2 – Age-depth models for YED1 and Alas1
- Figure S3 – C/N values of YED1 and Alas1 plotted over  $\delta^{13}\text{C}$
- Figure S4 – Sediment triangle after Shepard
- Figure S5 – Grain size distribution for the YED1 core
- Figure S6 – Grain size distribution for the Alas1 core

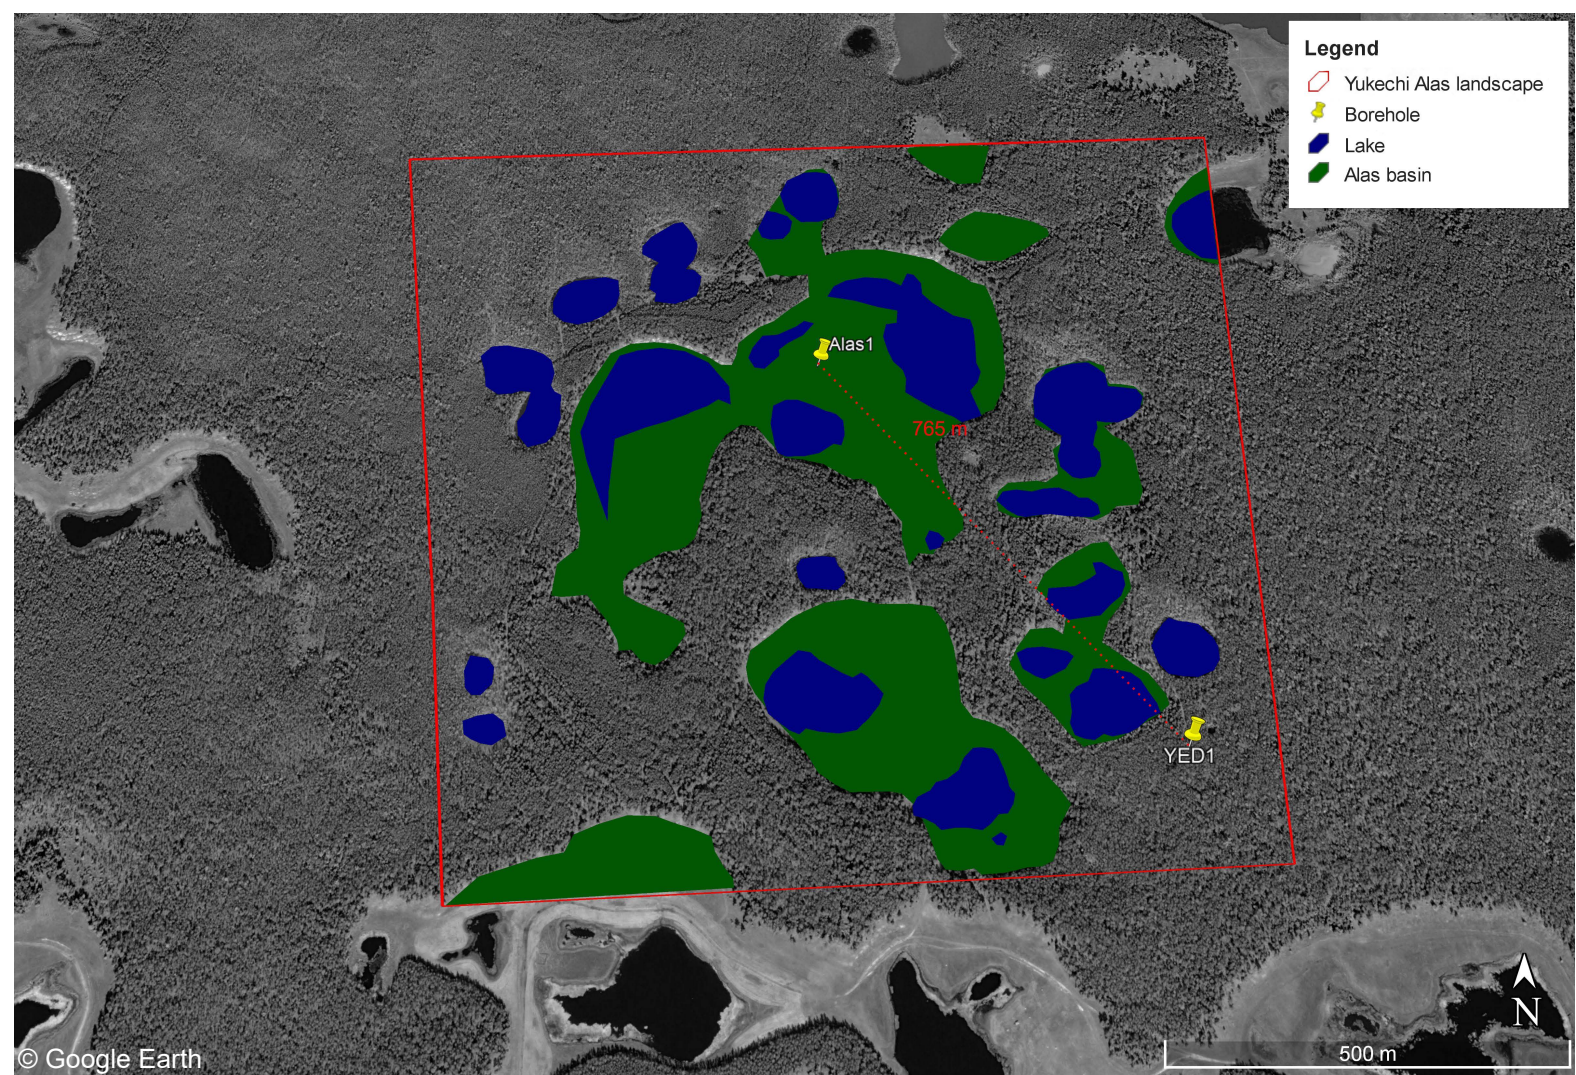

Figure S1 - Digital mapping of the Yukechi Alas landscape (red); lakes were digitalized in blue, Alas basins were digitalized in green; sampling locations Alas1 and YED1 marked in yellow; the 765 m distance between YED1 and Alas1 is marked by a red dotted line; satellite image taken from Google Earth.

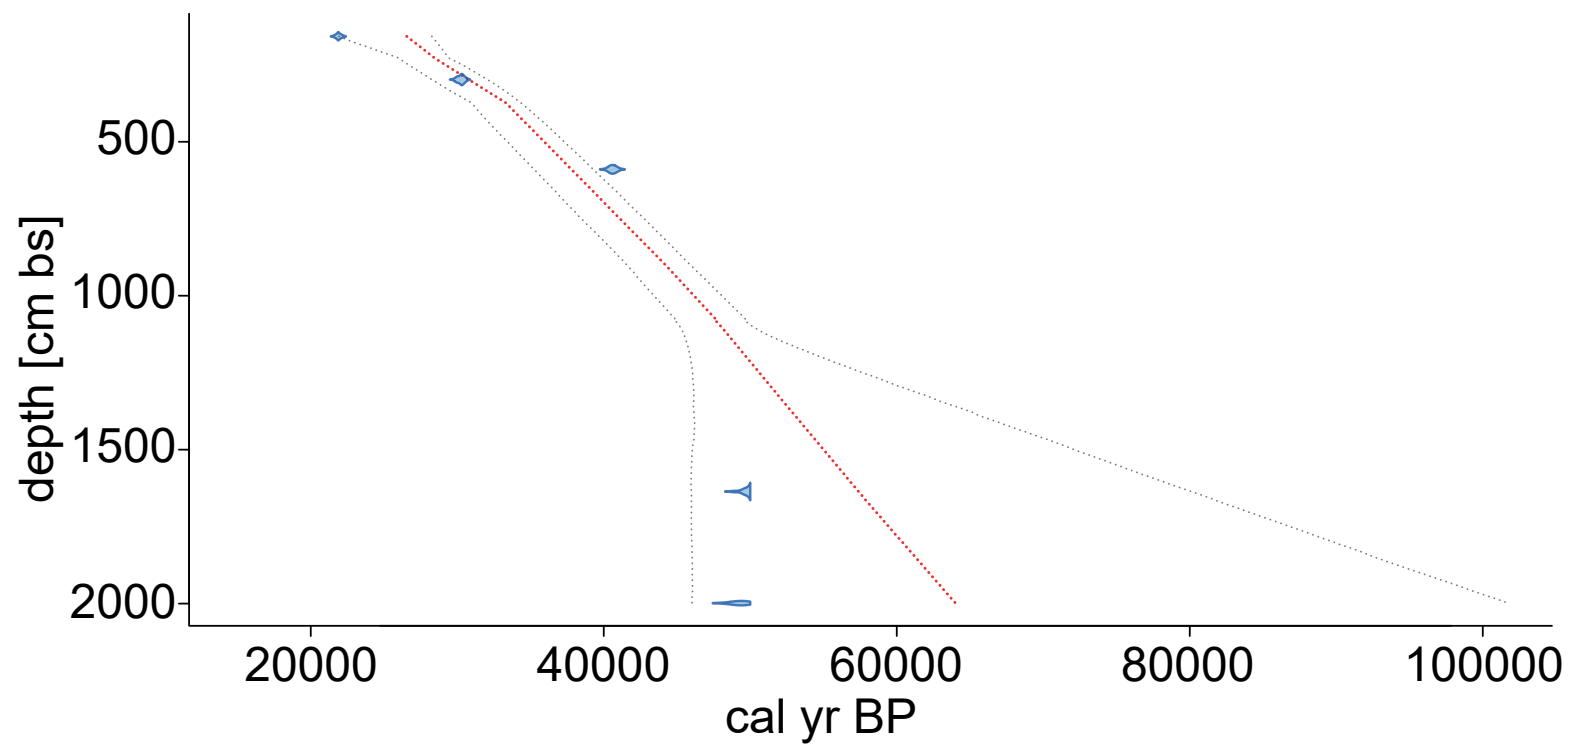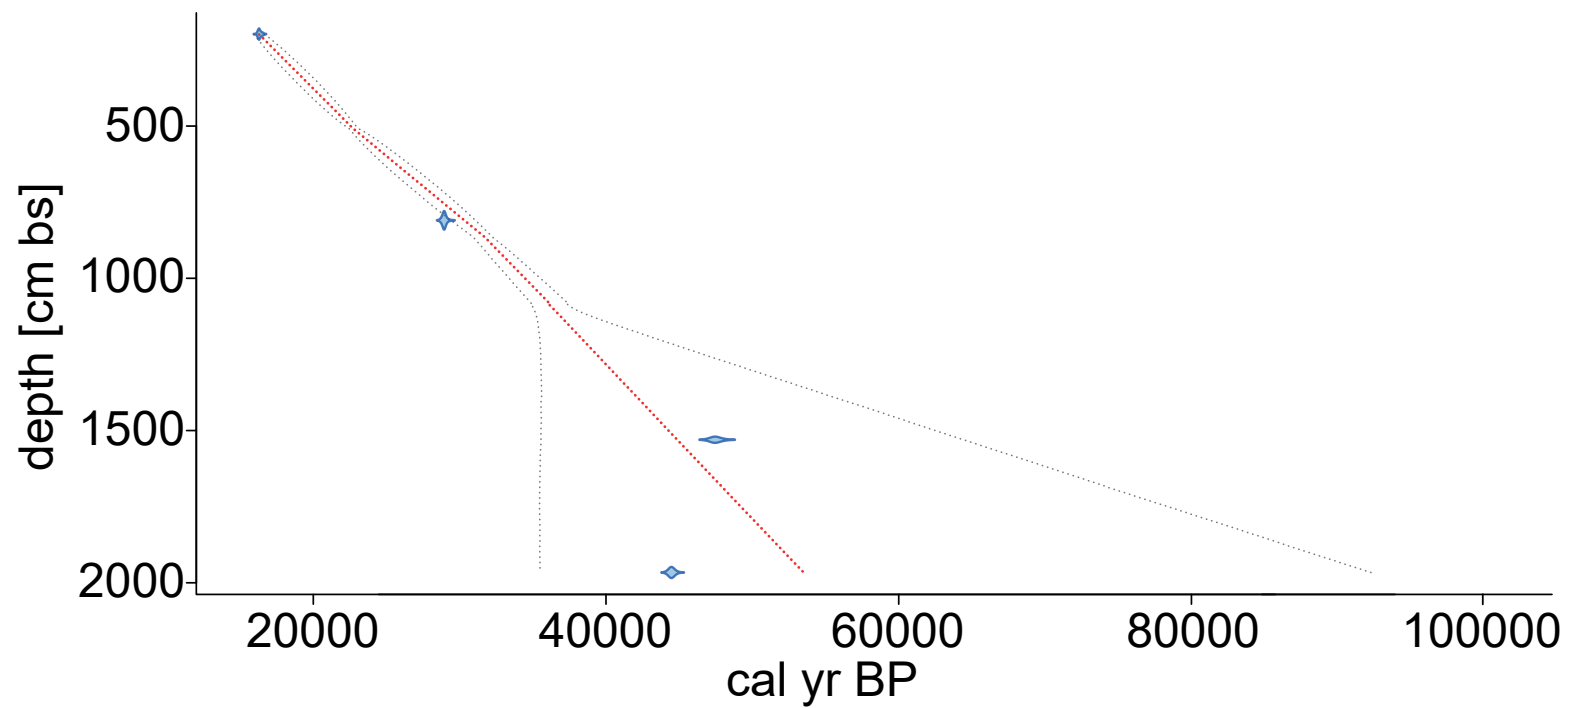

Figure S2 - Age-depth model for YED1 and Alas1; radiocarbon ages in blue with uncertainties; median in red; model range indicated by grey dotted lines; created with the Bacon package in the R environment.

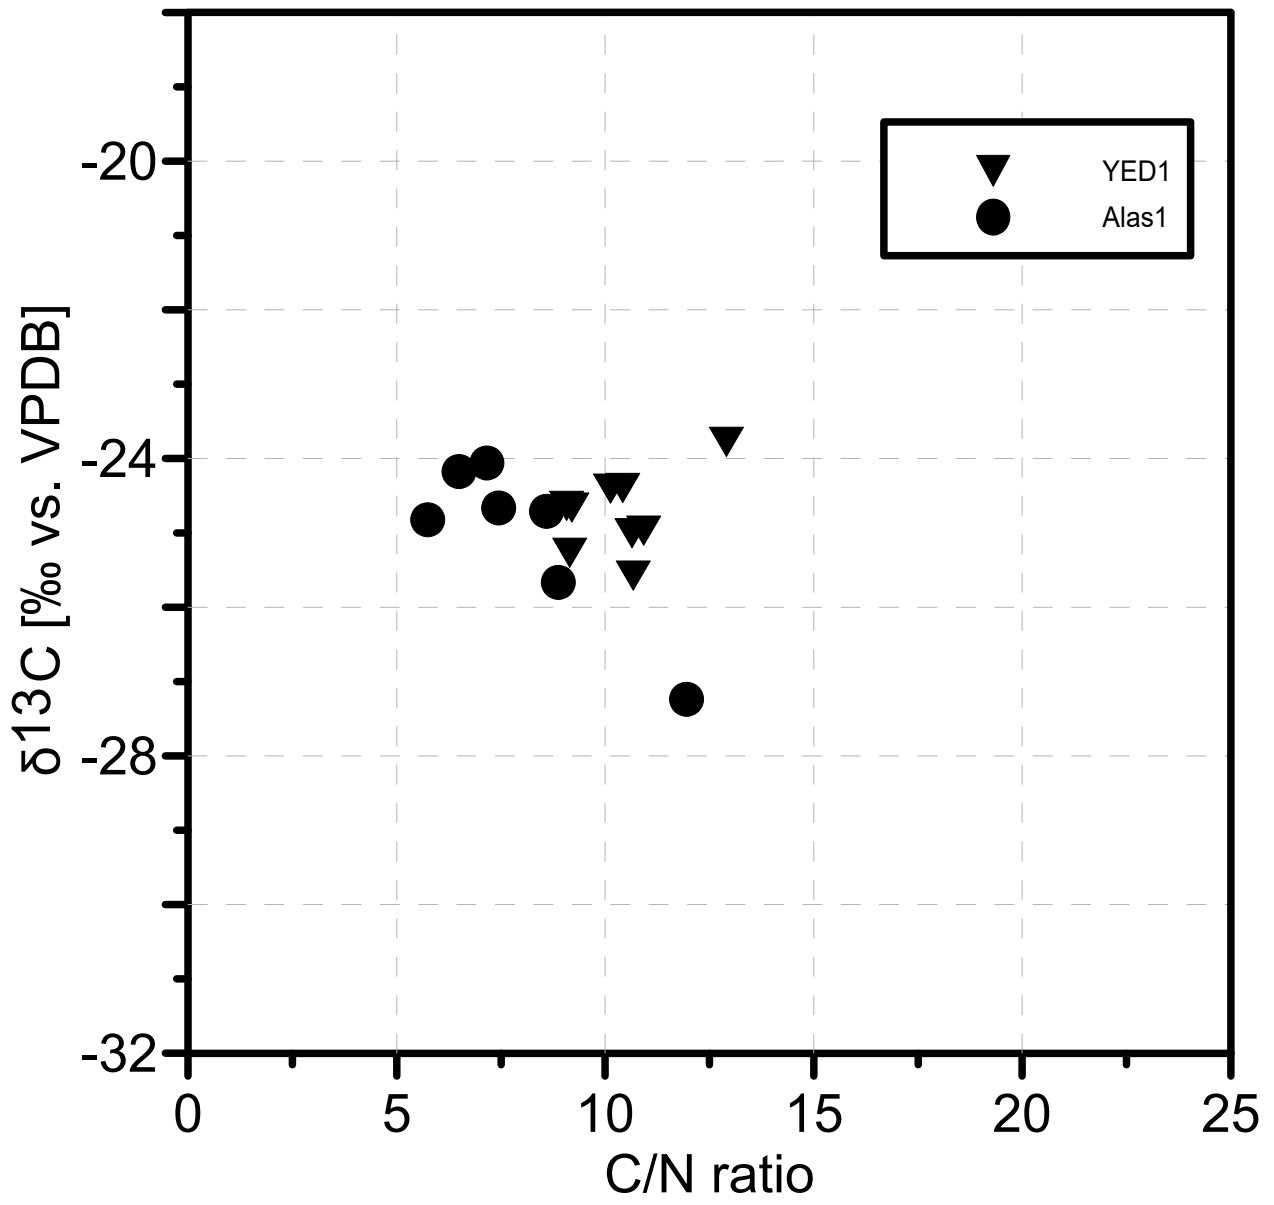

Figure S3 - C/N values of YED1 (triangles) and Alas1 (dots) plotted over  $\delta^{13}\text{C}$  values.

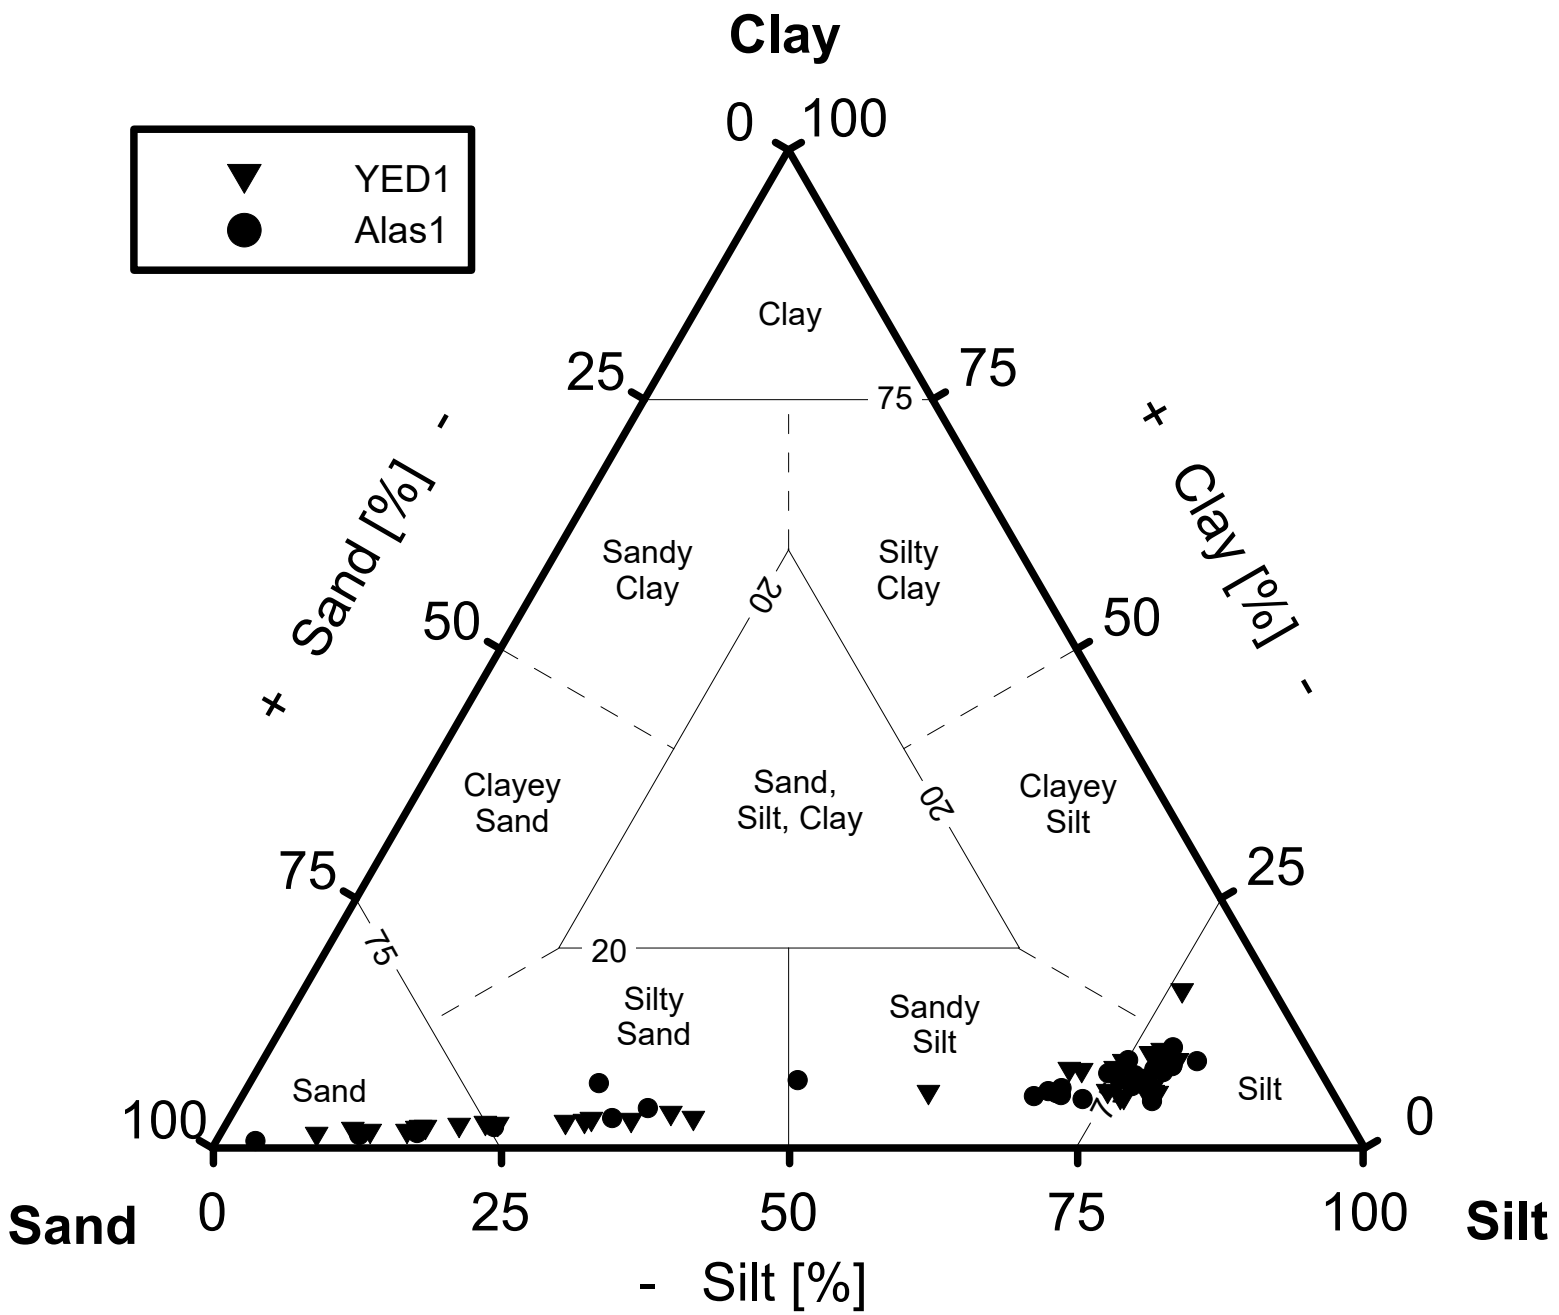

Figure S4 - Sediment triangle after Shepard showing the grain size composition.

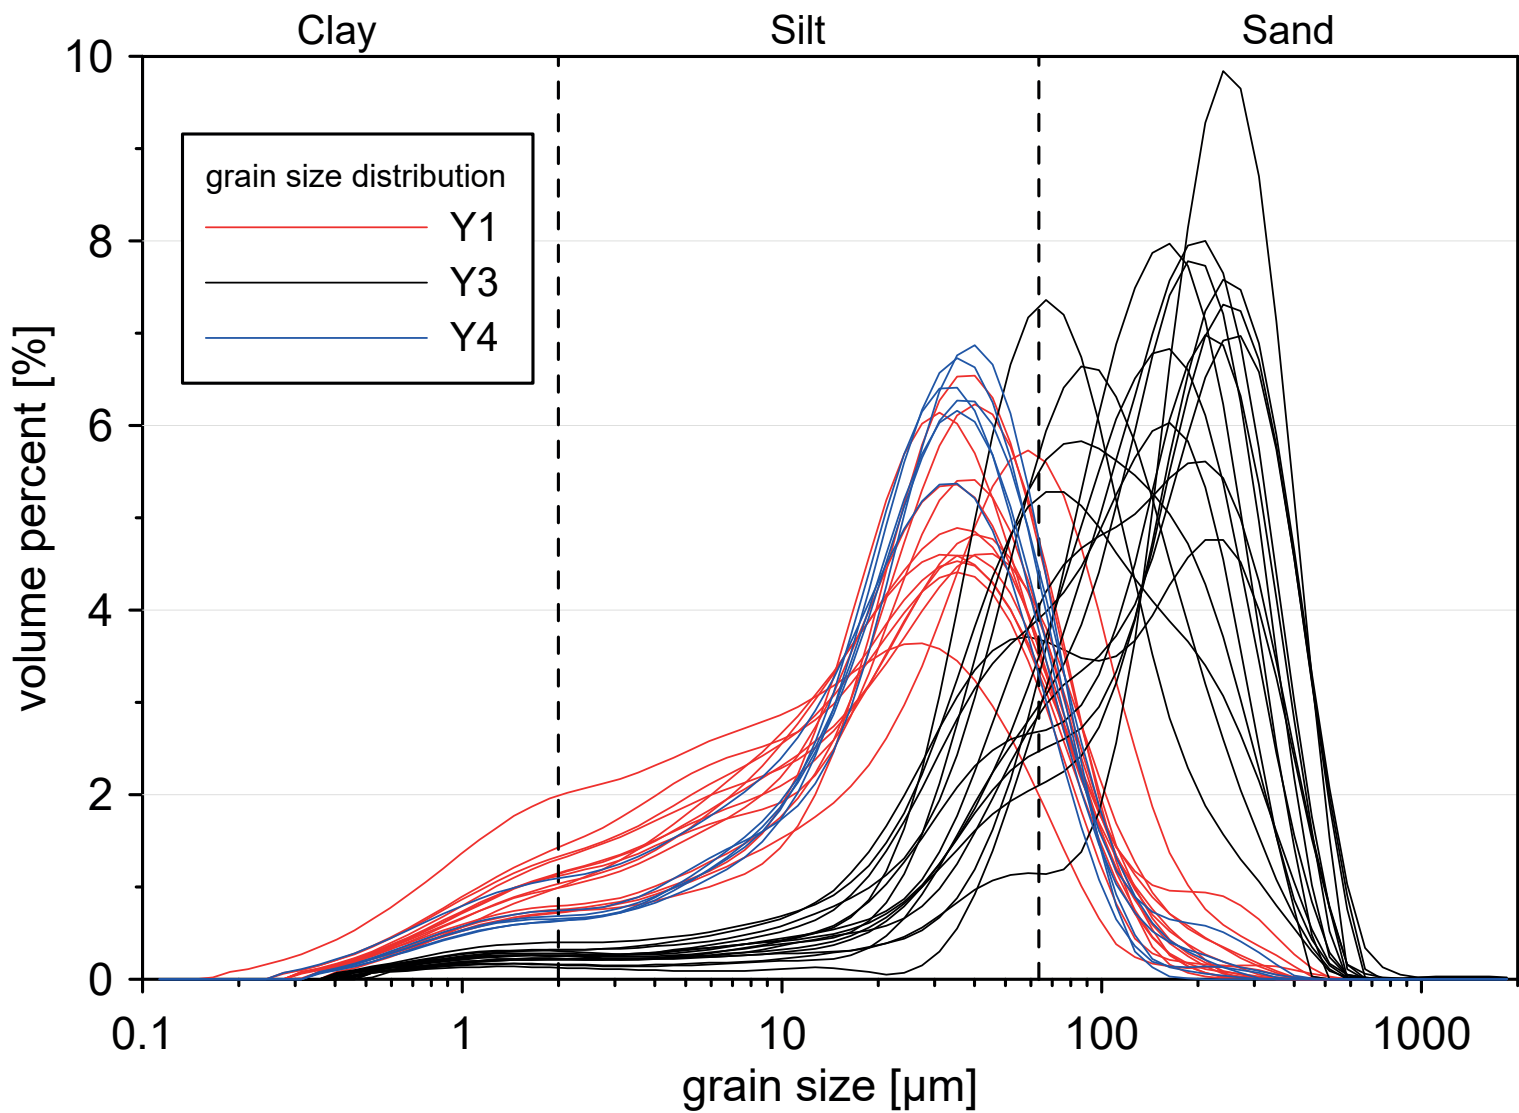

Figure S5 - Grain size distribution for the YED1 core; Y1 to Y4 indicate the different stratigraphical units; core unit Y2 did not hold enough sediment.

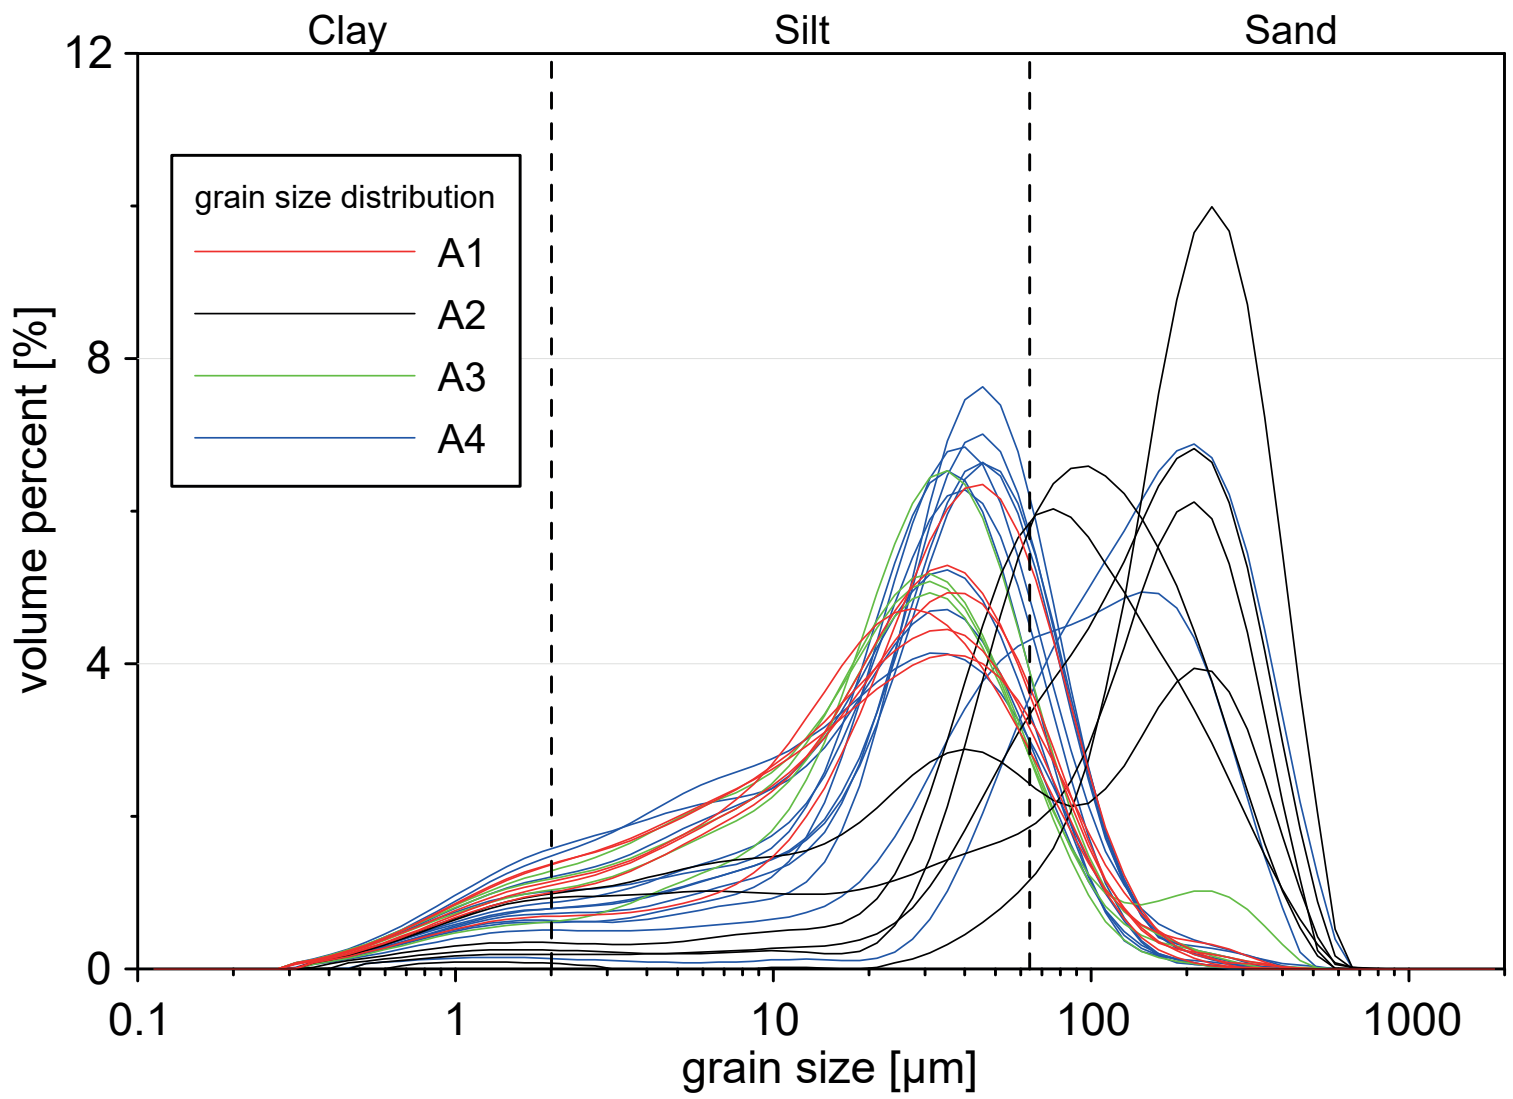

Figure S6 - Grain size distribution for the Alas1 core; A1 to A4 mark the different stratigraphic units.
